# Supplementary material for: HIV‐infected patients' beliefs about their chronic co‐treatments in comparison with their combined antiretroviral therapy
Source: PubMed Central journal article supplement — HIV Med. 2017 Aug 16;19(1):49–58. doi: 10.1111/hiv.12542 (PMC5724507; doi:10.1111/hiv.12542), 2017-08-16
Supplement: HIV-19-49-s002.pdf [file HIV-19-49-s002.pdf]

N° SHCS : «**COHORT\_ID**» Questionnaire Belief Medication Questionnaire « BMQ » (© Prof. Robert Horne)

Nous aimerions vous poser des questions au sujet de  **votre vision personnelle des médicaments antirétroviraux (trithérapie)**. Vous trouverez ci-dessous certaines affirmations que d'autres personnes ont faites au sujet de leurs médicaments antirétroviraux (trithérapie). Merci d'indiquer pour chacune d'elles dans quelle mesure vous êtes d'accord en cochant la case correspondante.

**Il n'y a pas de bonne ou de mauvaise réponse, votre vision personnelle nous intéresse**

|                                                                                                                       | [1]                      | [2]                      | [3]                      | [4]                      | [5]                      |
|-----------------------------------------------------------------------------------------------------------------------|--------------------------|--------------------------|--------------------------|--------------------------|--------------------------|
| Visions du traitement antirétroviral                                                                                  | Tout à fait d'accord     | D'accord                 | Incertain                | En désaccord             | Fortement en désaccord   |
| 1. Ma santé dépend actuellement des médicaments antirétroviraux                                                       | <input type="checkbox"/> |
| 2. Le fait de devoir prendre des médicaments antirétroviraux m'inquiète                                               | <input type="checkbox"/> |
| 3. Ma vie serait impossible sans médicaments antirétroviraux                                                          | <input type="checkbox"/> |
| 4. Je suis parfois inquiet/inquiète des effets à long terme du traitement antirétroviral                              | <input type="checkbox"/> |
| 5. Je serais très malade sans médicaments antirétroviraux                                                             | <input type="checkbox"/> |
| 6. Les médicaments antirétroviraux sont un mystère pour moi                                                           | <input type="checkbox"/> |
| 7. Ma santé à l'avenir dépendra des médicaments antirétroviraux                                                       | <input type="checkbox"/> |
| 8. Les médicaments antirétroviraux perturbent ma vie                                                                  | <input type="checkbox"/> |
| 9. Je suis parfois inquiet/inquiète de devenir trop dépendant(e) des médicaments antirétroviraux                      | <input type="checkbox"/> |
| 10. Les médicaments antirétroviraux gardent mon VIH sous contrôle                                                     | <input type="checkbox"/> |
| 11. Les médicaments antirétroviraux me donnent des effets secondaires désagréables                                    | <input type="checkbox"/> |
| 12. Utiliser des médicaments antirétroviraux est embarrassant                                                         | <input type="checkbox"/> |
| 13. Oublier ces médicaments durant un jour n'aura pas d'importance à long terme                                       | <input type="checkbox"/> |
| 14. Les médicaments antirétroviraux sont mon meilleur espoir pour l'avenir                                            | <input type="checkbox"/> |
| 15. Il est improbable que je souffre d'un effet secondaire grave des médicaments antirétroviraux dans le mois à venir | <input type="checkbox"/> |
| 16. Prendre des médicaments antirétroviraux s'est révélé bien pire que ce que j'attendais                             | <input type="checkbox"/> |
| 17. J'ai reçu assez d'informations sur les médicaments antirétroviraux                                                | <input type="checkbox"/> |
| 18. Les médicaments antirétroviraux me gardent en vie                                                                 | <input type="checkbox"/> |
| 19. Le goût des médicaments antirétroviraux m'indispose                                                               | <input type="checkbox"/> |

Maintenant, nous aimerions vous poser des questions au sujet de votre vision personnelle des autres médicaments prescrits de façon chronique (par exemple, pour votre hypertension, votre diabète, votre cholestérol, votre ostéoporose, votre dépression, etc.). **Ces questions se rapportent uniquement au/aux médicament(s) que vous avez le plus tendance à oublier ou à ne pas prendre** parmi ces médicaments prescrits.

Vous trouverez ci-dessous certaines affirmations que d'autres personnes ont faites au sujet de leurs médicaments. Merci d'indiquer pour chacune d'elles dans quelle mesure vous êtes d'accord en cochant la case correspondante.

**Il n'y a pas de bonne ou de mauvaise réponse, votre vision personnelle nous intéresse**

|                                                                                                        | [1]<br>Tout à fait<br>d'accord | [2]<br>D'accord          | [3]<br>Incertain         | [4]<br>En désaccord      | [5]<br>Fortement en<br>désaccord |
|--------------------------------------------------------------------------------------------------------|--------------------------------|--------------------------|--------------------------|--------------------------|----------------------------------|
| <b>Croyances spécifiques</b>                                                                           |                                |                          |                          |                          |                                  |
| 1. Ma santé, aujourd'hui, dépend de mon traitement.                                                    | <input type="checkbox"/>       | <input type="checkbox"/> | <input type="checkbox"/> | <input type="checkbox"/> | <input type="checkbox"/>         |
| 2. Avoir à prendre un traitement m'inquiète.                                                           | <input type="checkbox"/>       | <input type="checkbox"/> | <input type="checkbox"/> | <input type="checkbox"/> | <input type="checkbox"/>         |
| 3. Ma vie serait impossible sans mon traitement.                                                       | <input type="checkbox"/>       | <input type="checkbox"/> | <input type="checkbox"/> | <input type="checkbox"/> | <input type="checkbox"/>         |
| 4. Sans mon traitement, je serais très malade.                                                         | <input type="checkbox"/>       | <input type="checkbox"/> | <input type="checkbox"/> | <input type="checkbox"/> | <input type="checkbox"/>         |
| 5. Je m'inquiète parfois à propos des effets à long terme de mon traitement.                           | <input type="checkbox"/>       | <input type="checkbox"/> | <input type="checkbox"/> | <input type="checkbox"/> | <input type="checkbox"/>         |
| 6. Mon traitement est un mystère pour moi.                                                             | <input type="checkbox"/>       | <input type="checkbox"/> | <input type="checkbox"/> | <input type="checkbox"/> | <input type="checkbox"/>         |
| 7. Ma santé future dépend de mon traitement.                                                           | <input type="checkbox"/>       | <input type="checkbox"/> | <input type="checkbox"/> | <input type="checkbox"/> | <input type="checkbox"/>         |
| 8. Mon traitement perturbe ma vie.                                                                     | <input type="checkbox"/>       | <input type="checkbox"/> | <input type="checkbox"/> | <input type="checkbox"/> | <input type="checkbox"/>         |
| 9. Je suis parfois inquiet(e) de devenir trop dépendant(e) de mon traitement.                          | <input type="checkbox"/>       | <input type="checkbox"/> | <input type="checkbox"/> | <input type="checkbox"/> | <input type="checkbox"/>         |
| 10. Mon traitement empêche mon état d'empirer.                                                         | <input type="checkbox"/>       | <input type="checkbox"/> | <input type="checkbox"/> | <input type="checkbox"/> | <input type="checkbox"/>         |
| <b>Croyances générales</b>                                                                             |                                |                          |                          |                          |                                  |
| 11. Les médecins utilisent trop de traitements.                                                        | <input type="checkbox"/>       | <input type="checkbox"/> | <input type="checkbox"/> | <input type="checkbox"/> | <input type="checkbox"/>         |
| 12. Les personnes qui prennent des médicaments devraient arrêter leur traitement de temps en temps.    | <input type="checkbox"/>       | <input type="checkbox"/> | <input type="checkbox"/> | <input type="checkbox"/> | <input type="checkbox"/>         |
| 13. La plupart des traitements provoquent une dépendance.                                              | <input type="checkbox"/>       | <input type="checkbox"/> | <input type="checkbox"/> | <input type="checkbox"/> | <input type="checkbox"/>         |
| 14. Les remèdes naturels sont plus sûrs que les traitements médicaux.                                  | <input type="checkbox"/>       | <input type="checkbox"/> | <input type="checkbox"/> | <input type="checkbox"/> | <input type="checkbox"/>         |
| 15. Les traitements font plus de mal que de bien.                                                      | <input type="checkbox"/>       | <input type="checkbox"/> | <input type="checkbox"/> | <input type="checkbox"/> | <input type="checkbox"/>         |
| 16. Tous les traitements sont des poisons.                                                             | <input type="checkbox"/>       | <input type="checkbox"/> | <input type="checkbox"/> | <input type="checkbox"/> | <input type="checkbox"/>         |
| 17. Les médecins accordent trop de confiance aux traitements.                                          | <input type="checkbox"/>       | <input type="checkbox"/> | <input type="checkbox"/> | <input type="checkbox"/> | <input type="checkbox"/>         |
| 18. Si les médecins passaient plus de temps avec les patients, ils prescriraient moins de traitements. | <input type="checkbox"/>       | <input type="checkbox"/> | <input type="checkbox"/> | <input type="checkbox"/> | <input type="checkbox"/>         |
